# Supplementary material for: The Combination of Neutrophil–Lymphocyte Ratio and Platelet–Lymphocyte Ratio with Liquid Biopsy Biomarkers Improves Prognosis Prediction in Metastatic Pancreatic Cancer
Source: MDPI journal article supplement (doi:10.3390/cancers13061210), 2021-03-10
Supplement: s1 [file s1]

The Combination of Neutrophil–Lymphocyte Ratio and Platelet–Lymphocyte Ratio with Liquid Biopsy Biomarkers Improves Prognosis Prediction in Metastatic Pancreatic Cancer

Supplementary Figures:

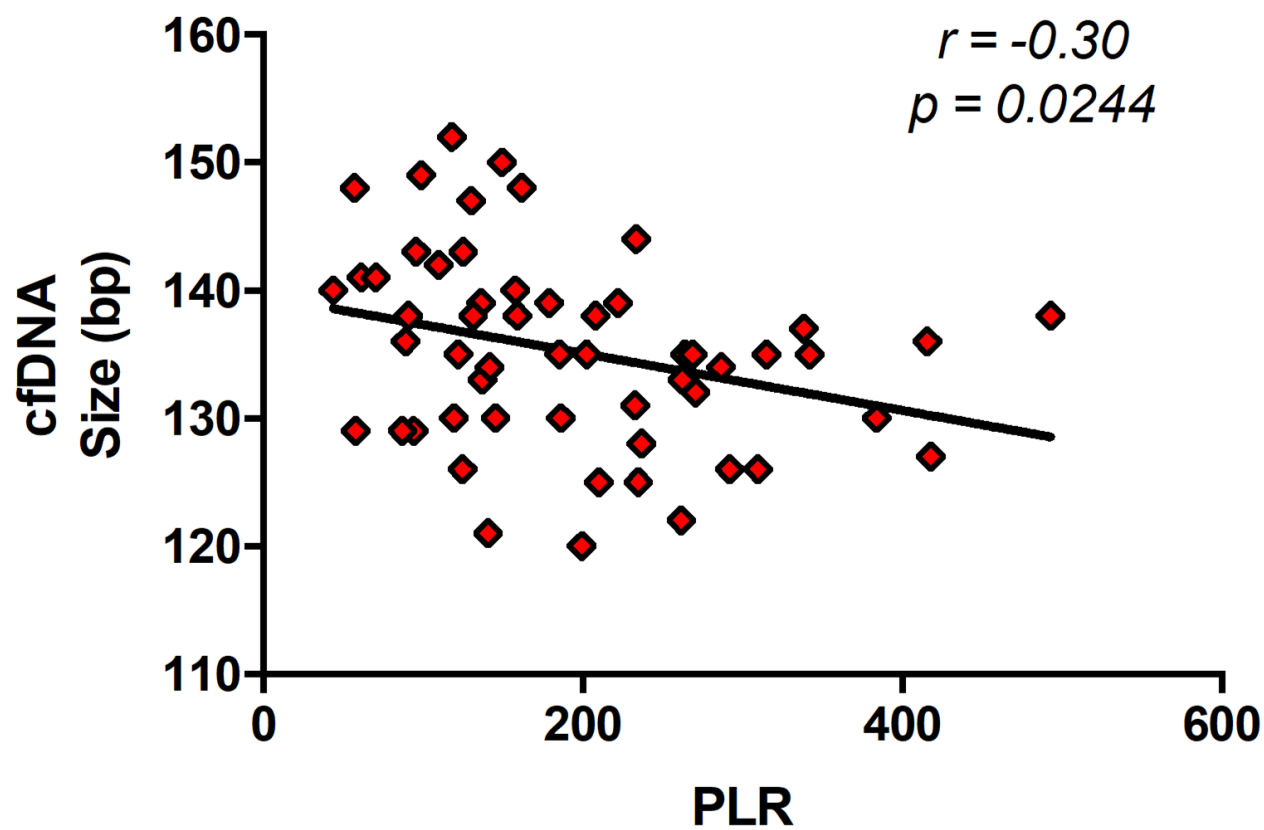

**Figure S1.** Correlation between platelet-lymphocyte ratio (PLR) and circulating cell-free DNA (cfDNA) size.

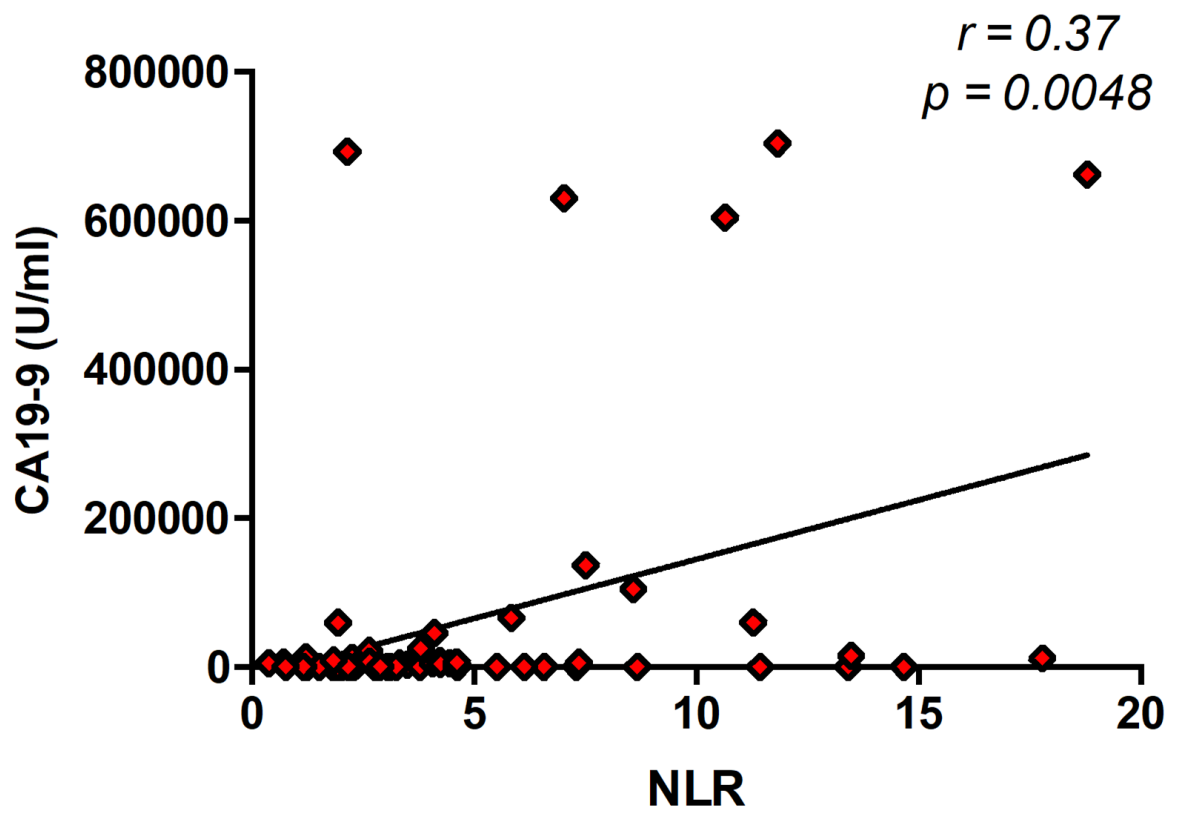

Figure S2. Correlation between neutrophil-lymphocyte ratio (NLR) and CA19-9.
